# Supplementary material
Source: PubMed Central journal article supplement (PMC3538134)
Supplement: NIHMS398526-supplement-5.pdf [file NIHMS398526-supplement-5.pdf]

T<sub>reg</sub> versus T<sub>conv</sub> nucleotide sequences:

Common CDR3 sequences - from different mice (bolded)

Common CDR3 sequences in same mouse - no common clones

Common clonal sequences - from different mice

Common clones in same mouse

| #  | V $\alpha$ |                     | T <sub>conv</sub> |          |          | CDR3 Sequence                                                                      | T <sub>reg</sub> |          |          | J $\alpha$          |
|----|------------|---------------------|-------------------|----------|----------|------------------------------------------------------------------------------------|------------------|----------|----------|---------------------|
|    | 2          | 13                  | 1                 | 2        | 3        |                                                                                    | 1                | 2        | 3        |                     |
| 1  | <u>2</u>   | <u>13</u>           | <u>1</u>          | <u>2</u> | <u>3</u> | C A T G A N T G K L T F                                                            | <u>1</u>         | <u>2</u> | <u>3</u> | <u>52</u>           |
| A  | •          | •                   | •                 | •        | •        | TGC <b>GCC</b> ACT GGA GCT AAC ACT GGA AAG CTC ACG TTT                             | •                | •        | •        | •                   |
| B  | •          | •                   | •                 | •        | •        | TGT GCA ACT GGA GCT AAC ACT GGA AAG CTC ACG TTT                                    | •                | •        | •        | •                   |
| C  | •          | •                   | •                 | •        | •        | TGT <b>GCC</b> ACT GGA GCT AAC ACT GGA AAG CTC ACG TTT                             | •                | •        | •        | •                   |
| D  | •          | •                   | •                 | •        | •        | TGT <b>GCG</b> ACT GGA GCT AAC ACT GGA AAG CTC ACG TTT                             | •                | •        | •        | •                   |
| E  | •          | •                   | •                 | •        | •        | TGT <b>GCT</b> ACT GGA GCT AAC ACT GGA AAG CTC ACG TTT                             | •                | •        | •        | •                   |
| F  | •          | •                   | •                 | •        | •        | TGC <b>GCT</b> ACT GGA GCT AAC ACT GGA AAG CTC ACG TTT                             | •                | •        | •        | •                   |
| 2  | <u>2</u>   |                     | <u>1</u>          | <u>2</u> | <u>3</u> | C G T G A N T G K L T F                                                            | <u>1</u>         | <u>2</u> | <u>3</u> | <u>52</u>           |
| A  | •          |                     | •                 | •        | •        | TGT <b>GCC</b> ACT GGA GCT AAC ACT GGA AAG CTC ACG TTT                             | •                | •        | •        | •                   |
| B  | •          |                     | •                 | •        | •        | TGT <b>GGA</b> ACT GGA GCT AAC ACT GGA AAG CTC ACG TTT                             | •                | •        | •        | •                   |
| C  | •          |                     | •                 | •        | •        | TGT <b>GGG</b> ACT GGA GCT AAC ACT GGA AAG CTC ACG TTT                             | •                | •        | •        | •                   |
| D  | •          |                     | •                 | •        | •        | TGT <b>GCT</b> ACT GGA GCT AAC ACT GGA AAG CTC ACG TTT                             | •                | •        | •        | •                   |
| 3  | <u>13</u>  | <u>15</u>           | <u>1</u>          | <u>2</u> | <u>3</u> | C A A G A N T G K L T F                                                            | <u>1</u>         | <u>2</u> | <u>3</u> | <u>27</u> <u>52</u> |
| A  | •          | •                   | •                 | •        | •        | TGT GCA <b>GCT</b> GGA GCT AAC ACT GGA AAG CTC ACG TTT                             | •                | •        | •        | •                   |
| B  | •          | •                   | •                 | •        | •        | TGT <b>GCG</b> <b>GCT</b> GGA GCT AAC ACT GGA AAG CTC ACG TTT                      | •                | •        | •        | •                   |
| C  | •          | •                   | •                 | •        | •        | TGT GCA GCA <b>GGG</b> <b>GCC</b> AAT ACA GGC AAA TTA ACC TTT                      | •                | •        | •        | •                   |
| D  | •          | •                   | •                 | •        | •        | TGT GCA <b>GCC</b> GGA GCT AAC ACT GGA AAG CTC ACG TTT                             | •                | •        | •        | •                   |
| E  | •          | •                   | •                 | •        | •        | TGT GCT GCT GGA GCT AAC ACT GGA AAG CTC ACG TTT                                    | •                | •        | •        | •                   |
| F  | •          | •                   | •                 | •        | •        | TGT GCA <b>GCG</b> GGA GCT AAC ACT GGA AAG CTC ACG TTT                             | •                | •        | •        | •                   |
| G  | •          | •                   | •                 | •        | •        | TGT GCA GCA <b>GGC</b> GCT AAC ACT GGA AAG CTC ACG TTT                             | •                | •        | •        | •                   |
| H  | •          | •                   | •                 | •        | •        | TGT <b>GCG</b> <b>GGC</b> GGA GCT AAC ACT GGA AAG CTC ACG TTT                      | •                | •        | •        | •                   |
| I  | •          | •                   | •                 | •        | •        | TGT GCT <b>GCC</b> <b>GGG</b> <b>GCC</b> AAT ACA GGC AAA TTA ACC TTT               | •                | •        | •        | •                   |
| J  | •          | •                   | •                 | •        | •        | TGT GCT <b>GCT</b> <b>GGG</b> <b>GCC</b> AAT ACA GGC AAA TTA ACC TTT               | •                | •        | •        | •                   |
| K  | •          | •                   | •                 | •        | •        | TGT GCT GCA GGA GCT AAC ACT GGA AAG CTC ACG TTT                                    | •                | •        | •        | •                   |
| L  | •          | •                   | •                 | •        | •        | TGT GCT <b>GCG</b> GGA GCT AAC ACT GGA AAG CTC ACG TTT                             | •                | •        | •        | •                   |
| 4  | <u>2</u>   | <u>13</u> <u>15</u> | <u>1</u>          | <u>2</u> | <u>3</u> | C A A G T N T G K L T F                                                            | <u>1</u>         | <u>2</u> | <u>3</u> | <u>27</u>           |
| A  | •          | •                   | •                 | •        | •        | TGT GCA GCA <b>GGC</b> ACC AAT ACA GGC AAA TTA ACC TTT                             | •                | •        | •        | •                   |
| B  | •          | •                   | •                 | •        | •        | TGT GCA GCA <b>GGG</b> ACC AAT ACA GGC AAA TTA ACC TTT                             | •                | •        | •        | •                   |
| C  | •          | •                   | •                 | •        | •        | TGT GCA <b>GCG</b> <b>GGG</b> ACC AAT ACA GGC AAA TTA ACC TTT                      | •                | •        | •        | •                   |
| D  | •          | •                   | •                 | •        | •        | TGT GCA <b>GCC</b> <b>GGC</b> ACC AAT ACA GGC AAA TTA ACC TTT                      | •                | •        | •        | •                   |
| E  | •          | •                   | •                 | •        | •        | TGT GCA <b>GCG</b> <b>GGC</b> ACC AAT ACA GGC AAA TTA ACC TTT                      | •                | •        | •        | •                   |
| F  | •          | •                   | •                 | •        | •        | TGT GCT <b>GCG</b> <b>GGC</b> ACC AAT ACA GGC AAA TTA ACC TTT                      | •                | •        | •        | •                   |
| G  | •          | •                   | •                 | •        | •        | TGT GCT GCA <b>GGC</b> ACC AAT ACA GGC AAA TTA ACC TTT                             | •                | •        | •        | •                   |
| H  | •          | •                   | •                 | •        | •        | TGT GCT GCA <b>GGA</b> ACC AAT ACA GGC AAA TTA ACC TTT                             | •                | •        | •        | •                   |
| I  | •          | •                   | •                 | •        | •        | TGT <b>GCC</b> <b>GGC</b> <b>GGC</b> ACC AAT ACA GGC AAA TTA ACC TTT               | •                | •        | •        | •                   |
| J  | •          | •                   | •                 | •        | •        | TGT GCT <b>GCT</b> <b>GGC</b> <b>ACC</b> <b>AAT</b> <b>ACT</b> GGC AAA TTA ACC TTT | •                | •        | •        | •                   |
| 5  | <u>5</u>   | <u>13</u> <u>15</u> | <u>1</u>          | <u>2</u> | <u>3</u> | C A G G T N T G K L T F                                                            | <u>1</u>         | <u>2</u> | <u>3</u> | <u>27</u>           |
| A  | •          | •                   | •                 | •        | •        | TGT <b>GCC</b> <b>GGG</b> <b>GGC</b> ACC AAT ACA GGC AAA TTA ACC TTT               | •                | •        | •        | •                   |
| B  | •          | •                   | •                 | •        | •        | TGT GCA <b>GGG</b> <b>GGC</b> ACC AAT ACA GGC AAA TTA ACC TTT                      | •                | •        | •        | •                   |
| C  | •          | •                   | •                 | •        | •        | TGT GCA <b>GGA</b> <b>GGC</b> ACC AAT ACA GGC AAA TTA ACC TTT                      | •                | •        | •        | •                   |
| D  | •          | •                   | •                 | •        | •        | TGT GCA <b>GGC</b> <b>GGC</b> ACC AAT ACA GGC AAA TTA ACC TTT                      | •                | •        | •        | •                   |
| E  | •          | •                   | •                 | •        | •        | TGT GCT <b>GGC</b> <b>GGC</b> ACC AAT ACA GGC AAA TTA ACC TTT                      | •                | •        | •        | •                   |
| F  | •          | •                   | •                 | •        | •        | TGT GCT <b>GGG</b> <b>GGC</b> ACC AAT ACA GGC AAA TTA ACC TTT                      | •                | •        | •        | •                   |
| 6  | <u>13</u>  |                     | <u>1</u>          | <u>2</u> | <u>3</u> | C A R G T N T G K L T F                                                            | <u>1</u>         | <u>2</u> | <u>3</u> | <u>27</u>           |
| A  | •          |                     | •                 | •        | •        | TGT GCA <b>CGG</b> <b>GGC</b> ACC AAT ACA GGC AAA TTA ACC TTT                      | •                | •        | •        | •                   |
| B  | •          |                     | •                 | •        | •        | TGT GCT <b>CGG</b> <b>GGC</b> ACC AAT ACA GGC AAA TTA ACC TTT                      | •                | •        | •        | •                   |
| 7  | <u>15</u>  |                     | <u>1</u>          | <u>2</u> | <u>3</u> | C A A S I G G N Y K P T F                                                          | <u>1</u>         | <u>2</u> | <u>3</u> | <u>6</u>            |
| A  | •          |                     | •                 | •        | •        | TGT GCA GCA AGC <b>ATA</b> GGA GGA AAC TAC AAA CCT ACG TTT                         | •                | •        | •        | •                   |
| 8  | <u>15</u>  |                     | <u>1</u>          | <u>2</u> | <u>3</u> | C A A A S S G S W Q L I F                                                          | <u>1</u>         | <u>2</u> | <u>3</u> | <u>22</u>           |
| A  | •          |                     | •                 | •        | •        | TGT GCA GCA <b>GCA</b> TCT TCT GGC AGC TGG CAA CTC ATC TTT                         | •                | •        | •        | •                   |
| B  | •          |                     | •                 | •        | •        | TGT GCA <b>GCG</b> <b>GCA</b> TCT TCT GGC AGC TGG CAA CTC ATC TTT                  | •                | •        | •        | •                   |
| C  | •          |                     | •                 | •        | •        | TGT GCA <b>GCC</b> <b>GCA</b> TCT TCT GGC AGC TGG CAA CTC ATC TTT                  | •                | •        | •        | •                   |
| 9  | <u>13</u>  | <u>15</u>           | <u>1</u>          | <u>2</u> | <u>3</u> | C A A S P N Y A Q G L T F                                                          | <u>1</u>         | <u>2</u> | <u>3</u> | <u>26</u>           |
| A  | •          | •                   | •                 | •        | •        | TGT GCA GCA AGC <b>CCT</b> AAC TAT GCC CAG GGA TTA ACC TTC                         | •                | •        | •        | •                   |
| B  | •          | •                   | •                 | •        | •        | TGT GCA GCA AGC <b>CCG</b> AAC TAT GCC CAG GGA TTA ACC TTC                         | •                | •        | •        | •                   |
| C  | •          | •                   | •                 | •        | •        | TGT GCT GCA AGT <b>CCC</b> AAC TAT GCC CAG GGA TTA ACC TTC                         | •                | •        | •        | •                   |
| D  | •          | •                   | •                 | •        | •        | TGT GCT GCA AGC <b>CCT</b> AAC TAT GCC CAG GGA TTA ACC TTC                         | •                | •        | •        | •                   |
| E  | •          | •                   | •                 | •        | •        | TGT GCT GCA AGT <b>CCG</b> AAC TAT GCC CAG GGA TTA ACC TTC                         | •                | •        | •        | •                   |
| F  | •          | •                   | •                 | •        | •        | TGT GCT GCA AGT <b>CCG</b> AAC TAT GCC CAG GGA TTA ACC TTC                         | •                | •        | •        | •                   |
| G  | •          | •                   | •                 | •        | •        | TGC <b>GCT</b> <b>GCA</b> <b>AGT</b> <b>CCA</b> AAC TAT GCC CAG GGA TTA ACC TTC    | •                | •        | •        | •                   |
| H  | •          | •                   | •                 | •        | •        | TGT GCA GCA AGC <b>CCA</b> AAC TAT GCC CAG GGA TTA ACC TTC                         | •                | •        | •        | •                   |
| I  | •          | •                   | •                 | •        | •        | TGT GCT GCA AGT <b>CCT</b> AAC TAT GCC CAG GGA TTA ACC TTC                         | •                | •        | •        | •                   |
|    | •          | •                   | •                 | •        | •        | TGT GCT GCA AGC <b>CCC</b> AAC TAT GCC CAG GGA TTA ACC TTC                         | •                | •        | •        | •                   |
| 10 | <u>5</u>   | <u>15</u>           | <u>1</u>          | <u>2</u> | <u>3</u> | C A A G G N A G A K L T F                                                          | <u>1</u>         | <u>2</u> | <u>3</u> | <u>39</u>           |
| A  | •          | •                   | •                 | •        | •        | TGT GCA <b>GCC</b> <b>GGG</b> <b>GGG</b> AAT GCA GGT GCC AAG CTC ACA TTC           | •                | •        | •        | •                   |
| B  | •          | •                   | •                 | •        | •        | TGT <b>GCG</b> <b>GCA</b> <b>GGG</b> <b>GGG</b> AAT GCA GGT GCC AAG CTC ACA TTC    | •                | •        | •        | •                   |
| C  | •          | •                   | •                 | •        | •        | TGT GCA GCA <b>GGG</b> <b>GGG</b> AAT GCA GGT GCC AAG CTC ACA TTC                  | •                | •        | •        | •                   |
| 11 | <u>2</u>   | <u>15</u>           | <u>1</u>          | <u>2</u> | <u>3</u> | C G R G T N T G K L T F                                                            | <u>1</u>         | <u>2</u> | <u>3</u> | <u>27</u>           |
| A  | •          | •                   | •                 | •        | •        | TGT <b>GCT</b> <b>CGC</b> <b>GGG</b> ACC AAT ACA GGC AAA TTA ACC TTT               | •                | •        | •        | •                   |
| B  | •          | •                   | •                 | •        | •        | TGT <b>GGA</b> <b>CGG</b> <b>GGC</b> ACC AAT ACA GGC AAA TTA ACC TTT               | •                | •        | •        | •                   |
| C  | •          | •                   | •                 | •        | •        | TGT <b>GGG</b> <b>CGG</b> <b>GGC</b> ACC AAT ACA GGC AAA TTA ACC TTT               | •                | •        | •        | •                   |
| 12 | <u>13</u>  | <u>15</u>           | <u>1</u>          | <u>2</u> | <u>3</u> | C A A G S N M G Y K L T F                                                          | <u>1</u>         | <u>2</u> | <u>3</u> | <u>9</u>            |
| A  | •          | •                   | •                 | •        | •        | TGT GCA GCA <b>GGA</b> <b>AGC</b> AAC ATG GGC TAC AAA CTT ACC TTC                  | •                | •        | •        | •                   |
| B  | •          | •                   | •                 | •        | •        | TGT GCA GCA <b>GGA</b> <b>TCC</b> AAC ATG GGC TAC AAA CTT ACC TTC                  | •                | •        | •        | •                   |
| C  | •          | •                   | •                 | •        | •        | TGT GCT GCA <b>GGG</b> <b>AGC</b> AAC ATG GGC TAC AAA CTT ACC TTC                  | •                | •        | •        | •                   |
| D  | •          | •                   | •                 | •        | •        | TGT GCT GCA <b>GGG</b> <b>AGC</b> AAC ATG GGC TAC AAA CTT ACC TTC                  | •                | •        | •        | •                   |
| E  | •          | •                   | •                 | •        | •        | TGT GCT GCA <b>GGT</b> <b>AGC</b> AAC ATG GGC TAC AAA CTT ACC TTC                  | •                | •        | •        | •                   |

Variable nucleotide(s) at given position

N-nucleotide or P-nucleotide
