# Supplementary material
Source: PubMed Central journal article supplement (PMC3538134)

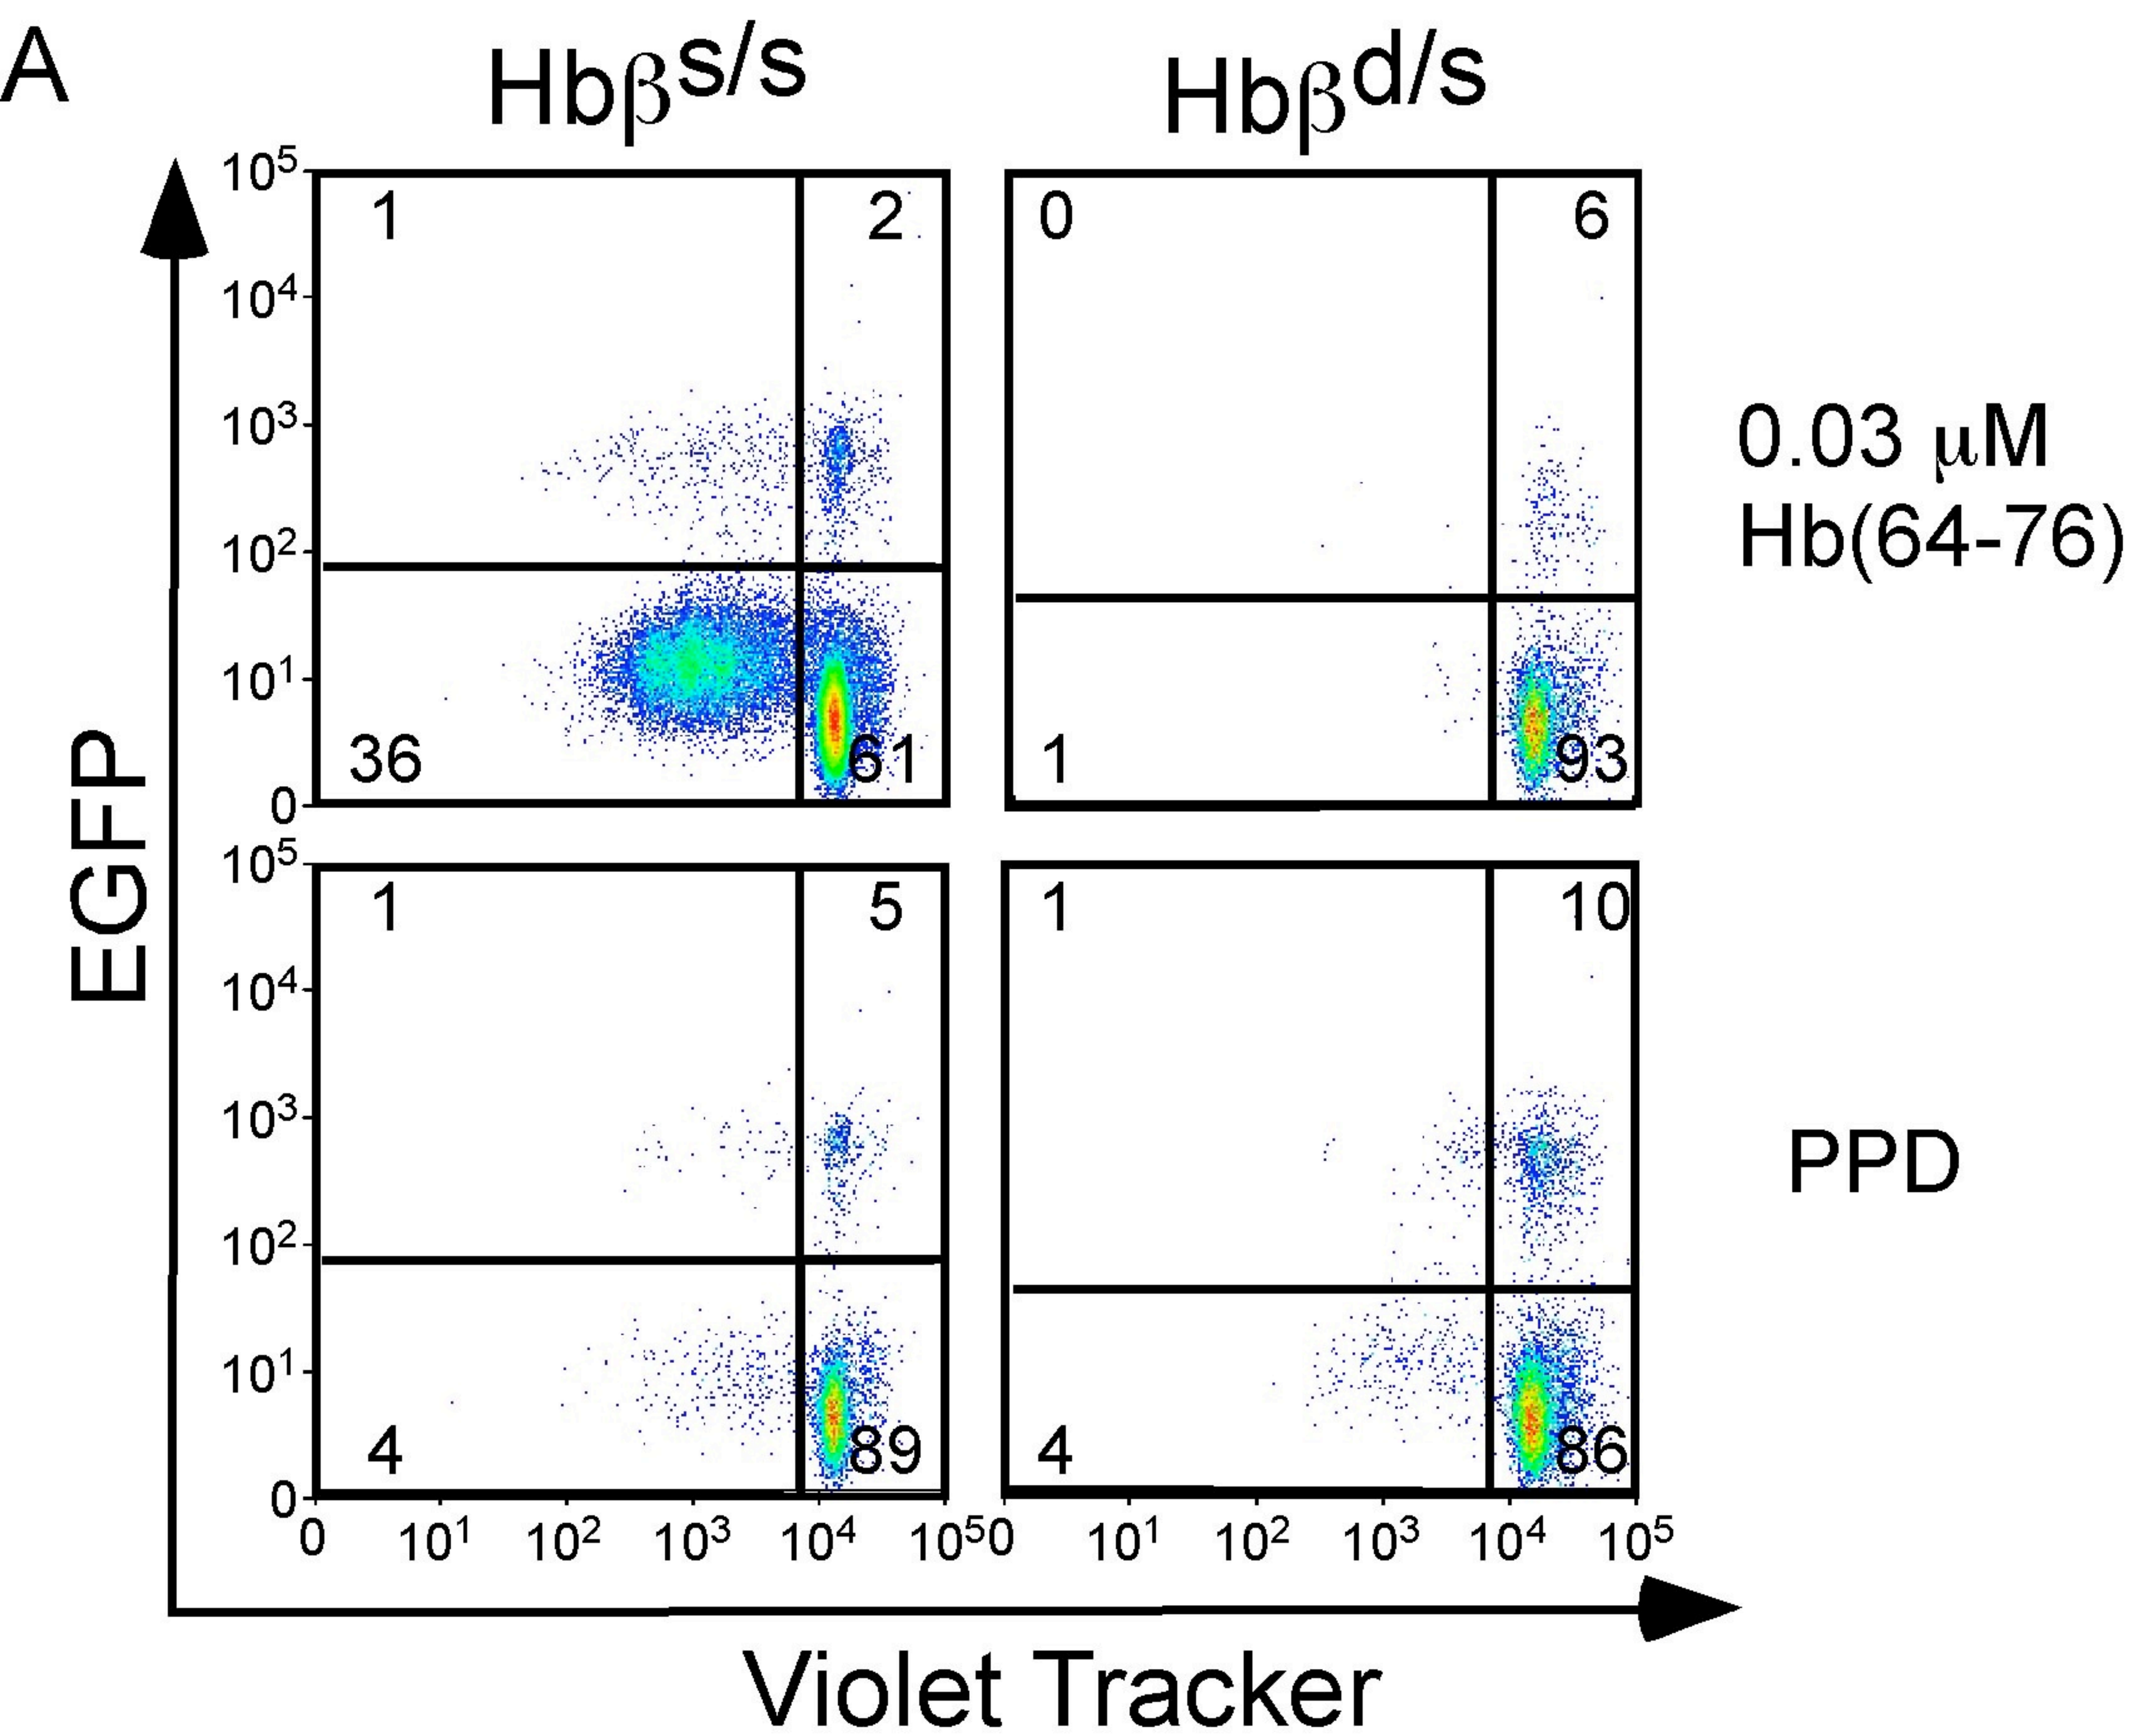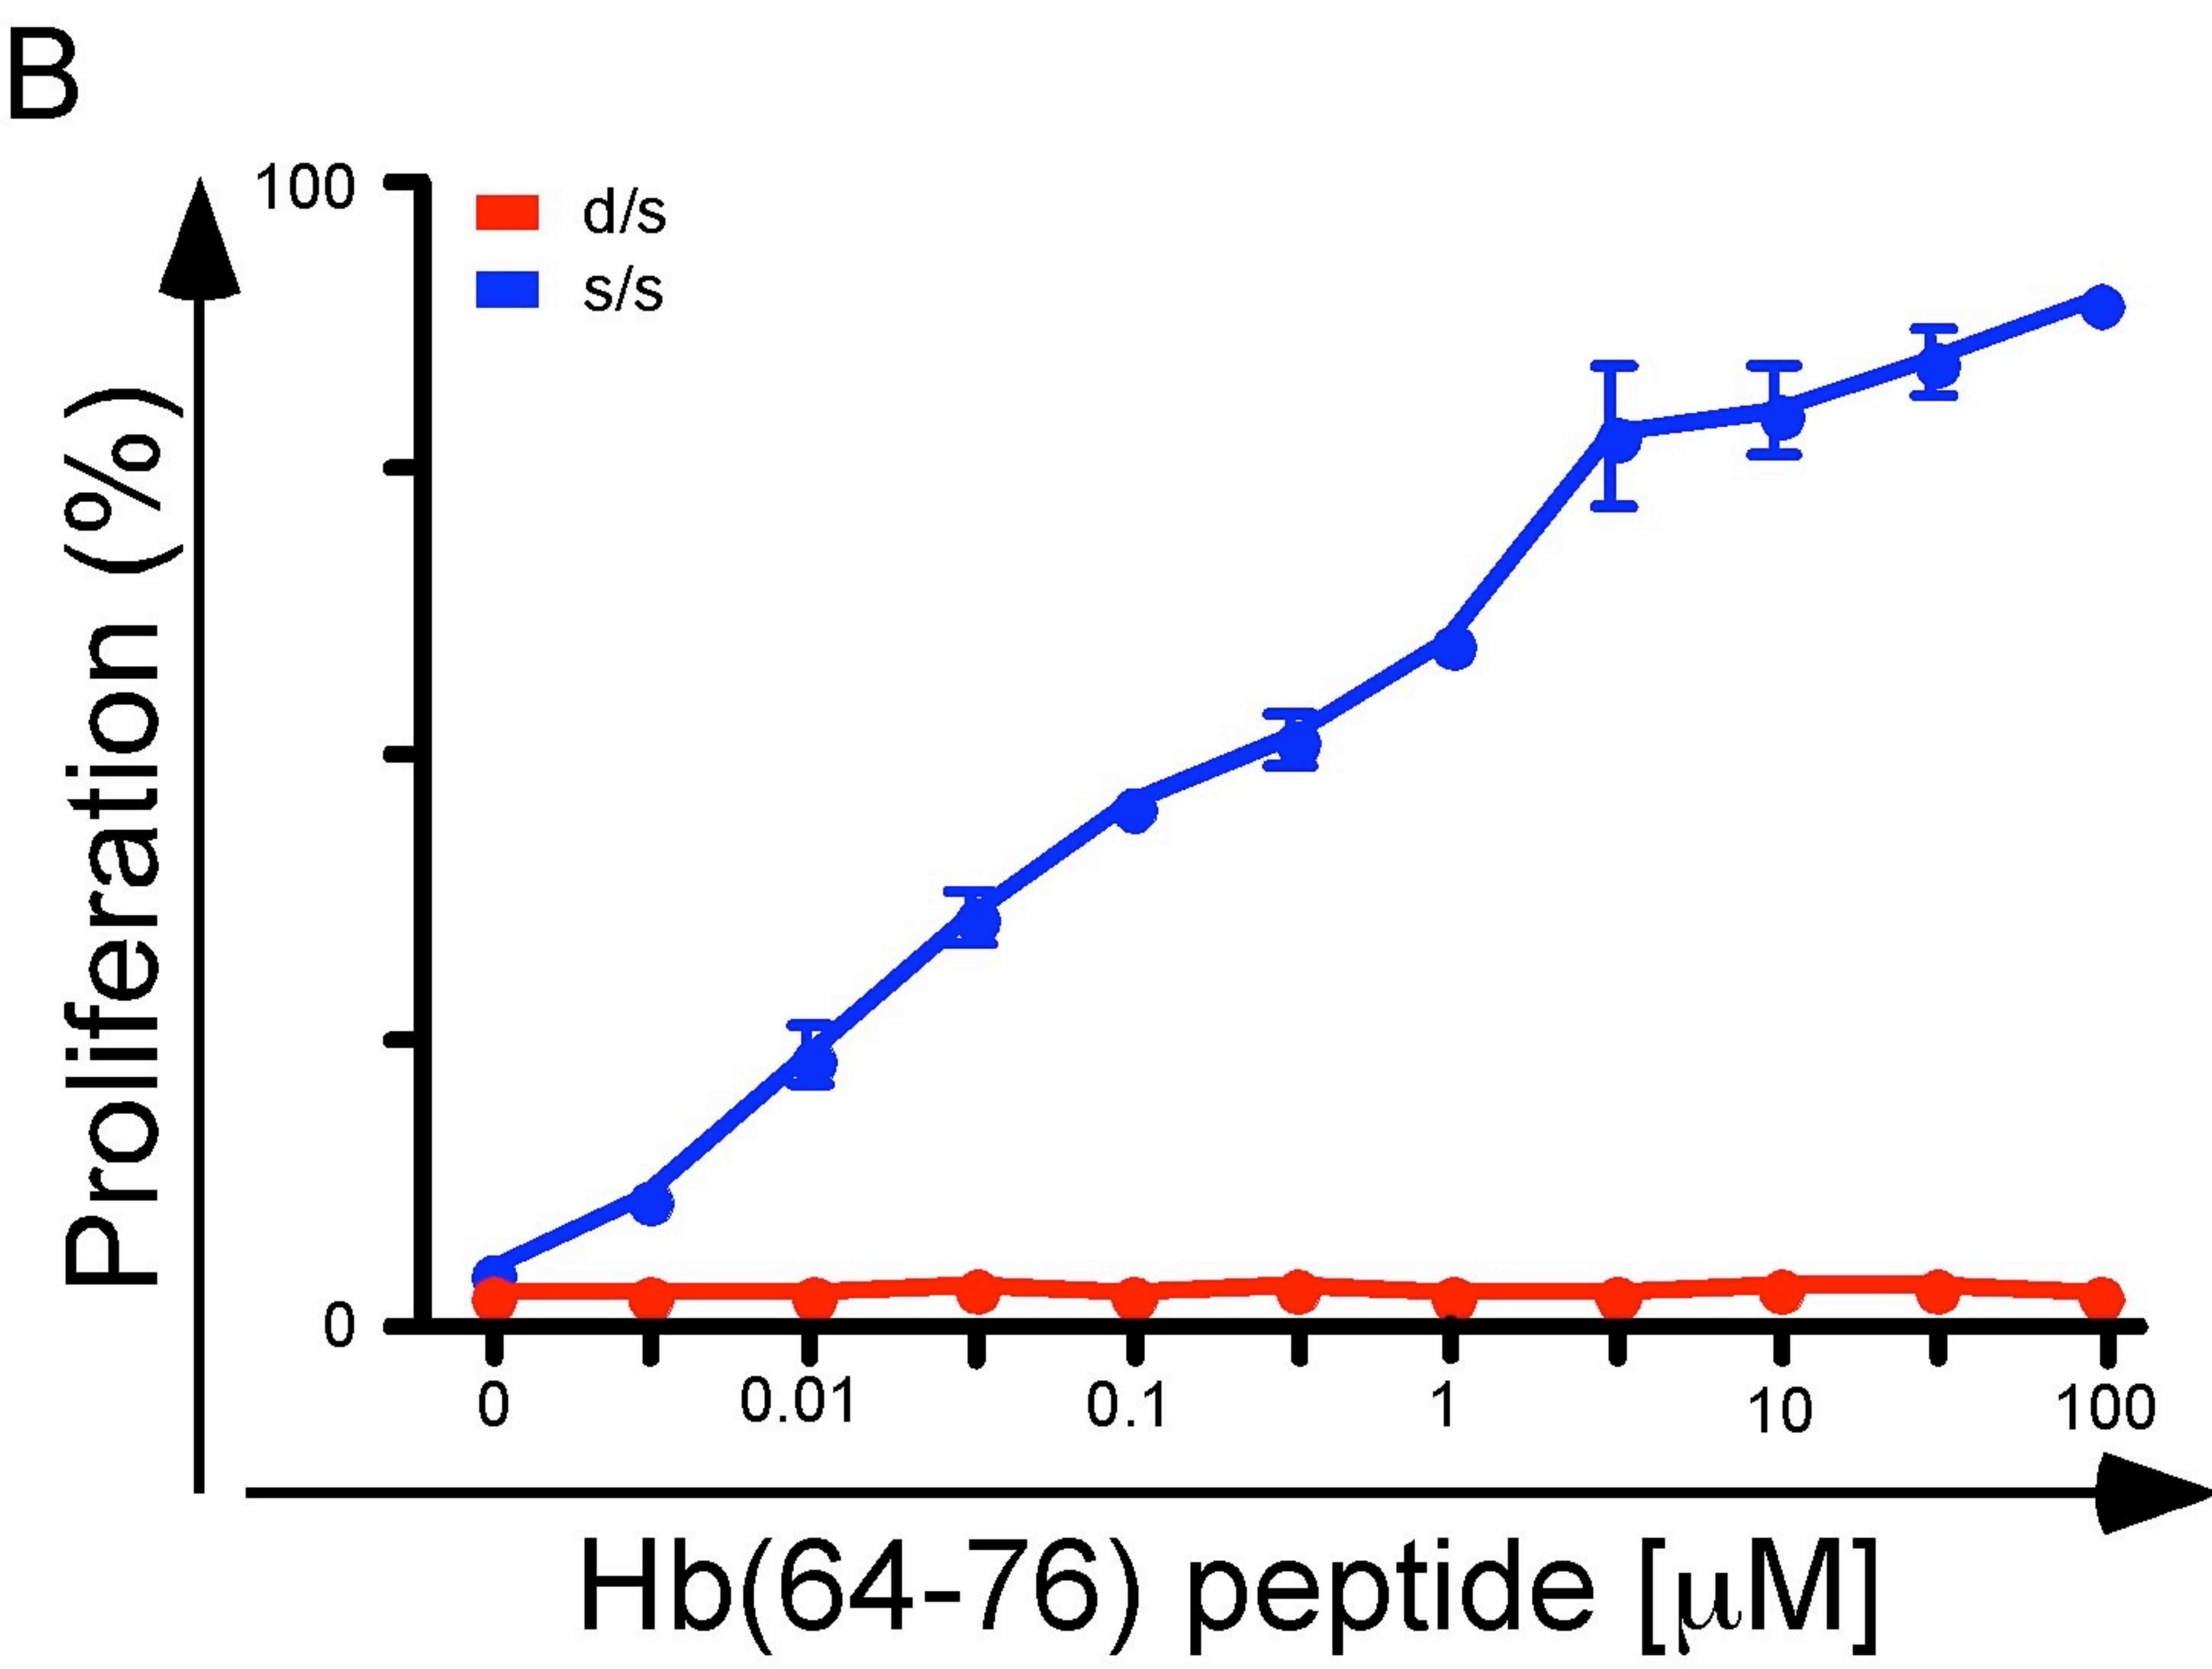

Supplement: NIHMS398526-supplement-2.pdf [file NIHMS398526-supplement-2.pdf]

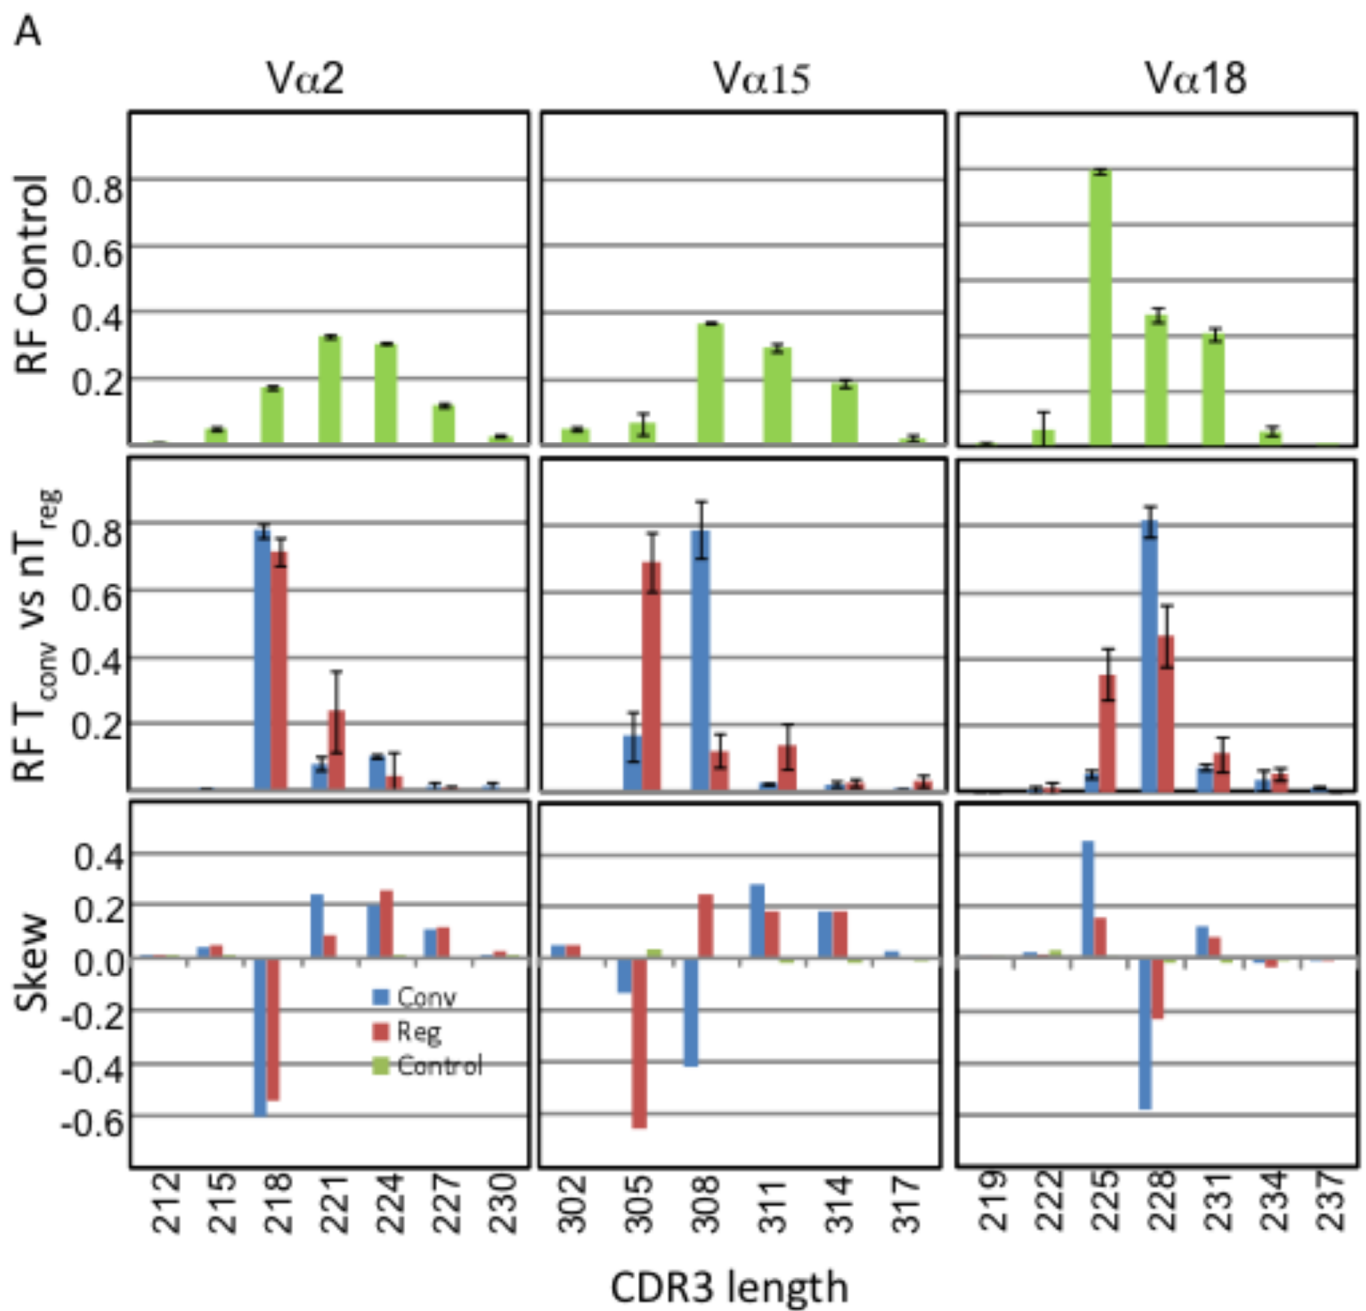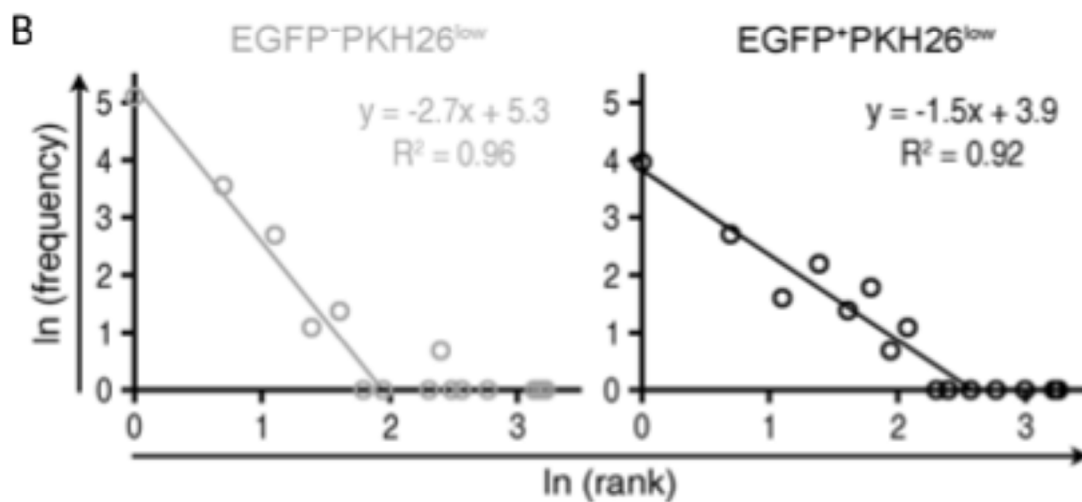

Supplement: NIHMS398526-supplement-3.pdf [file NIHMS398526-supplement-3.pdf]

**A***Vα2*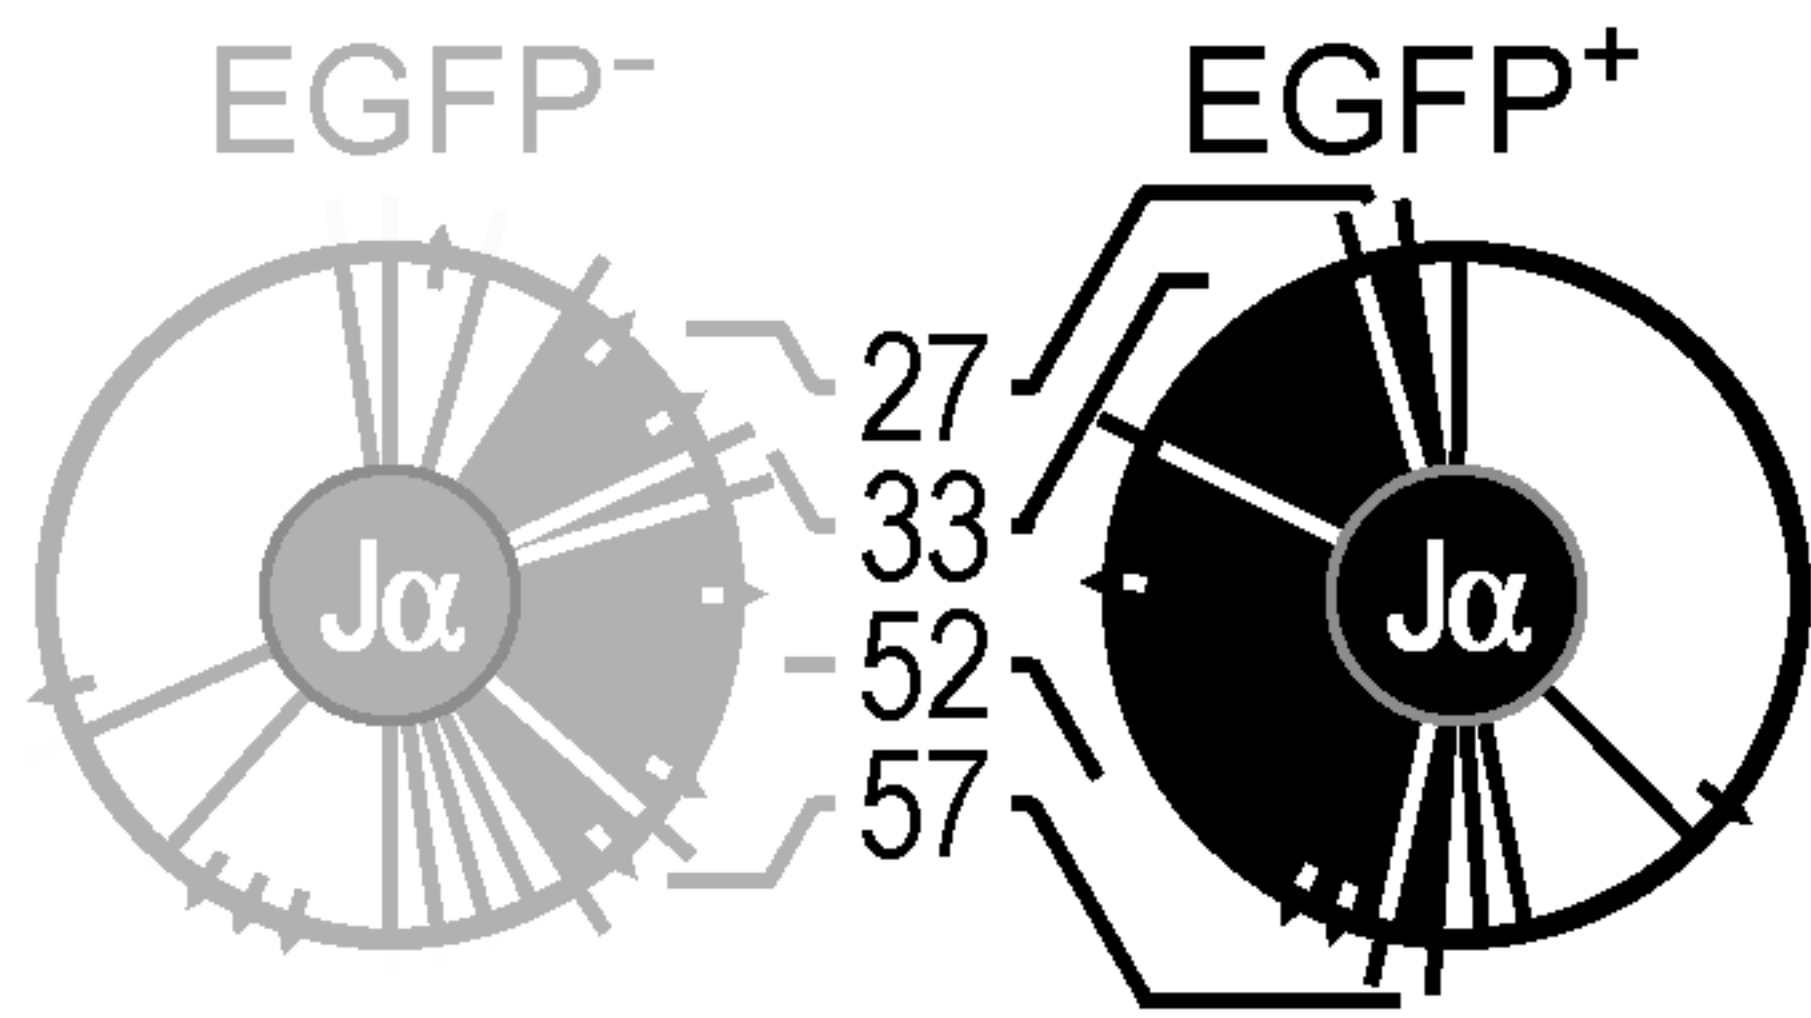*Vα3*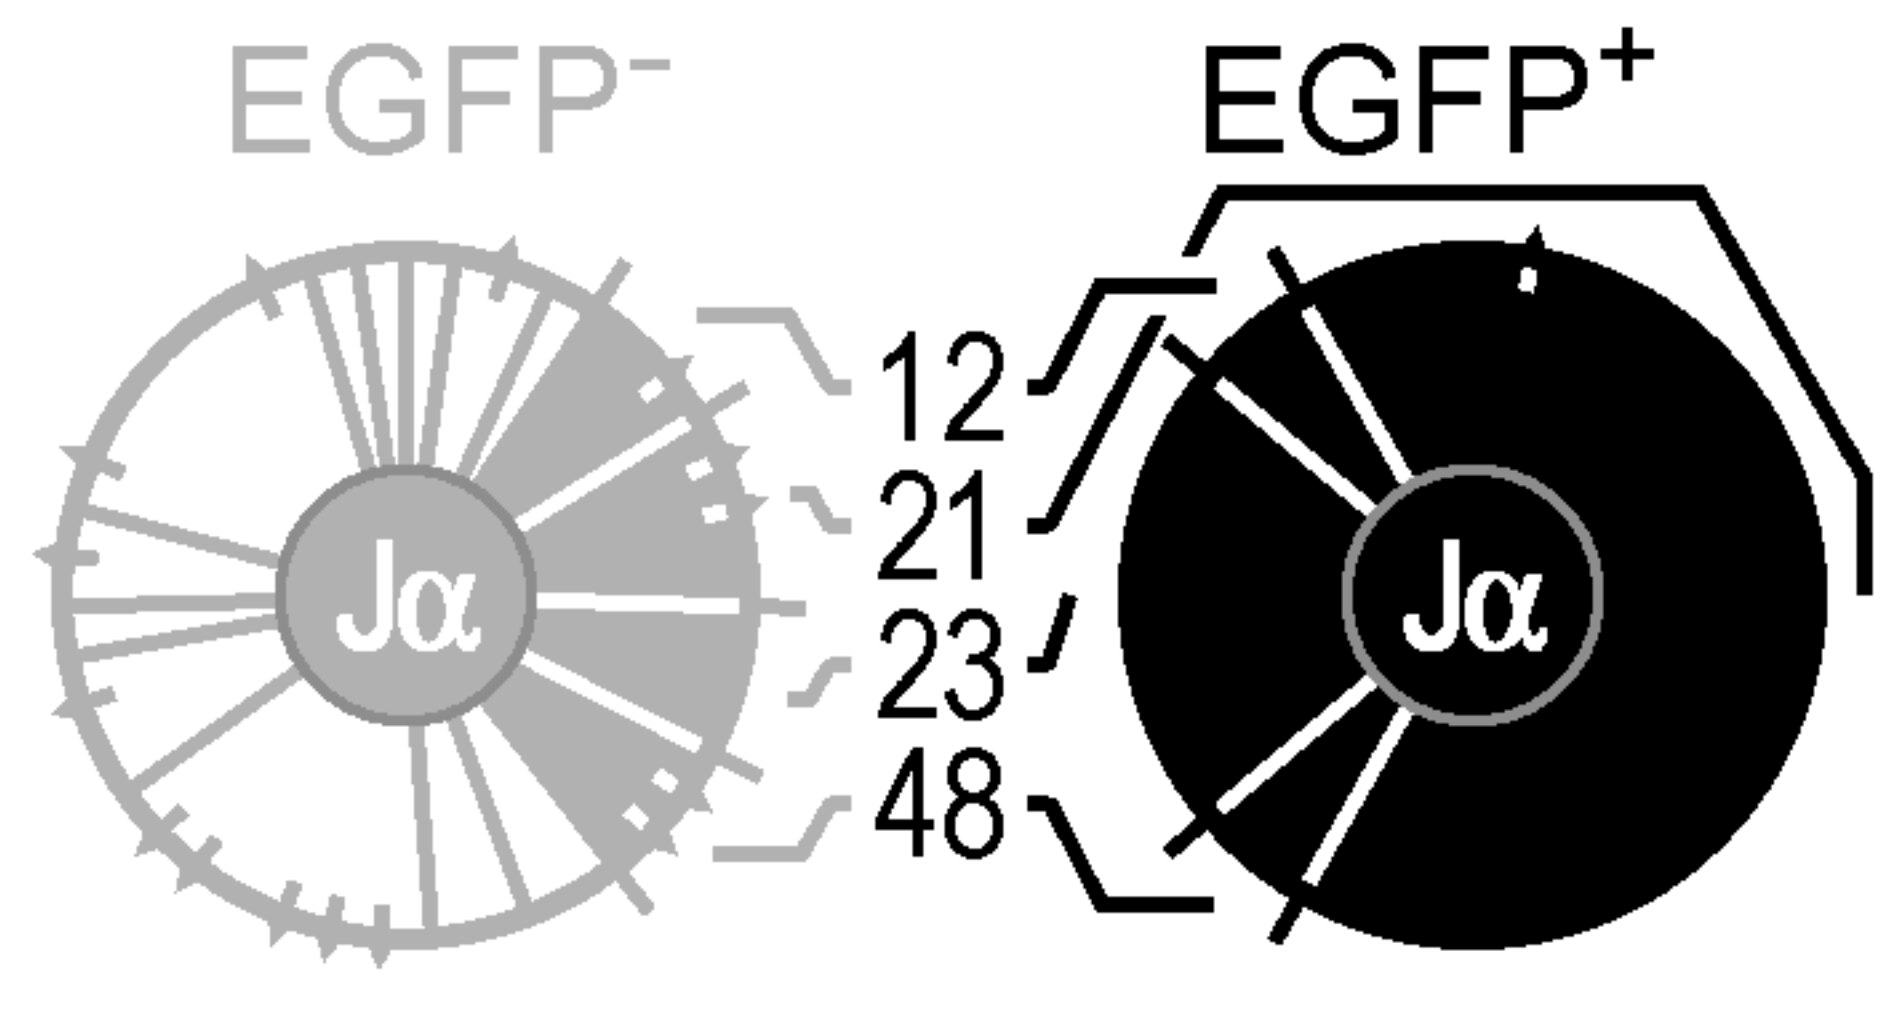*Vα5*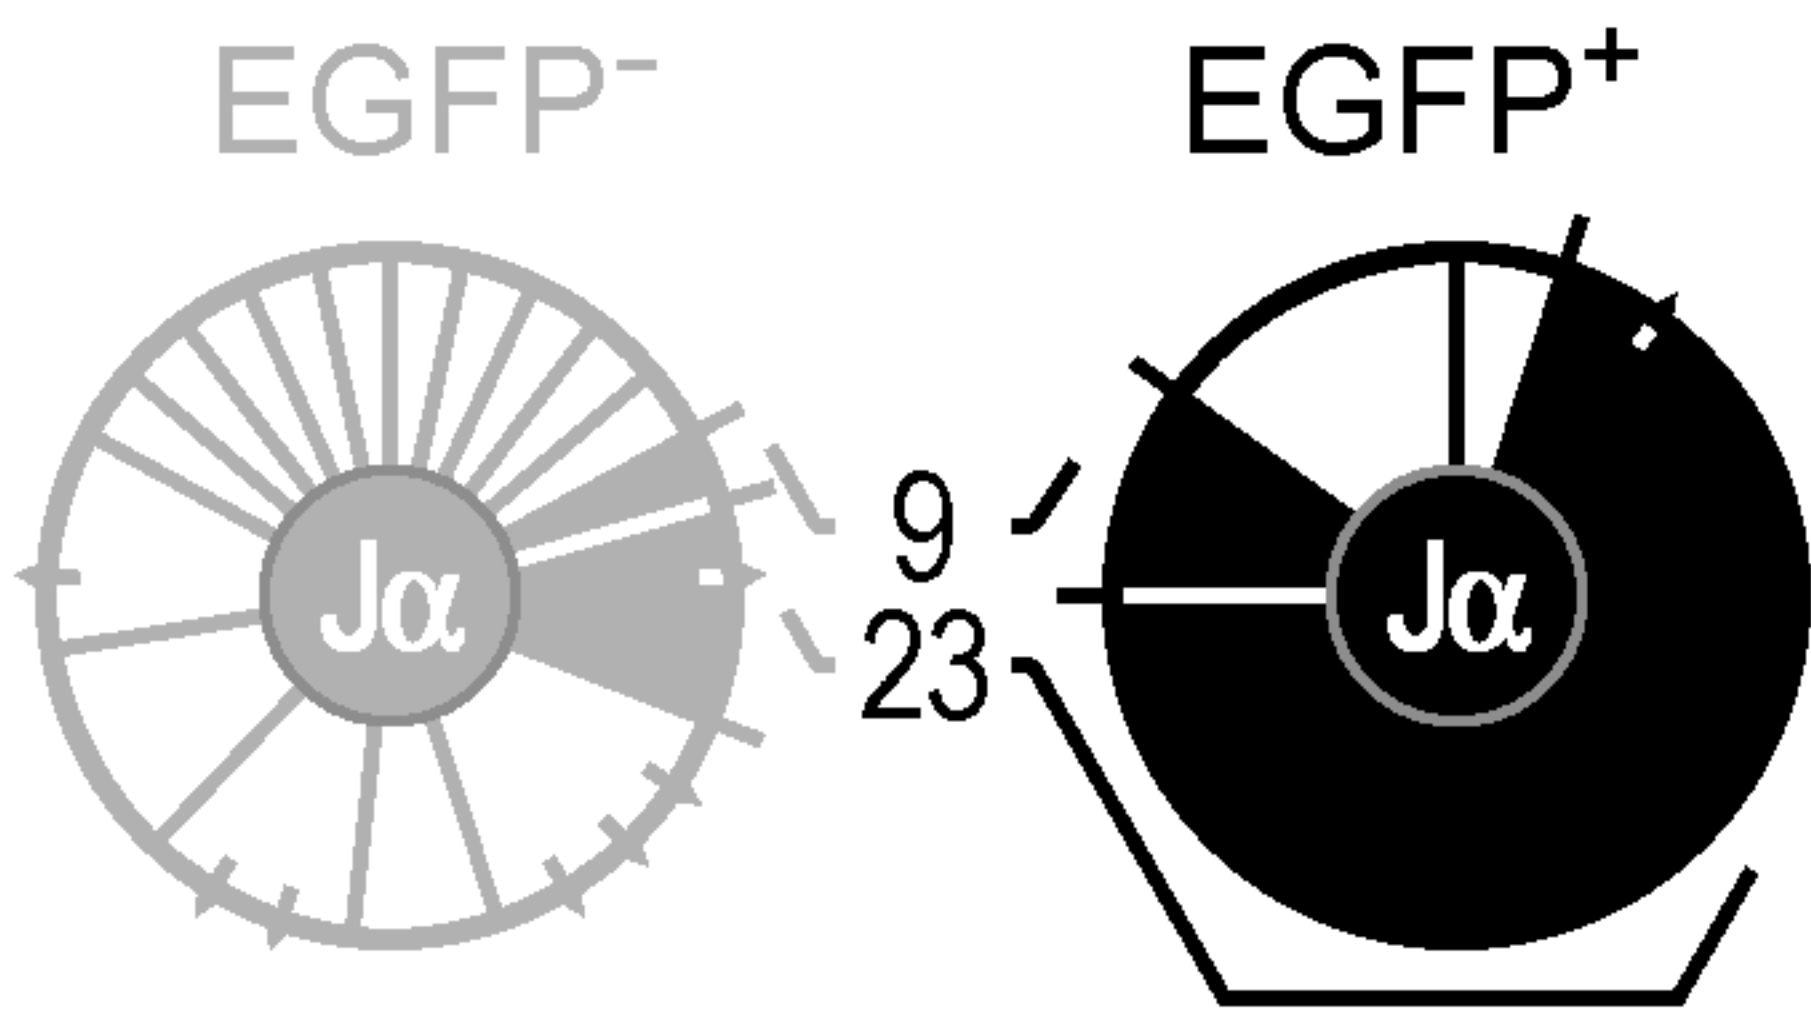*Vα13*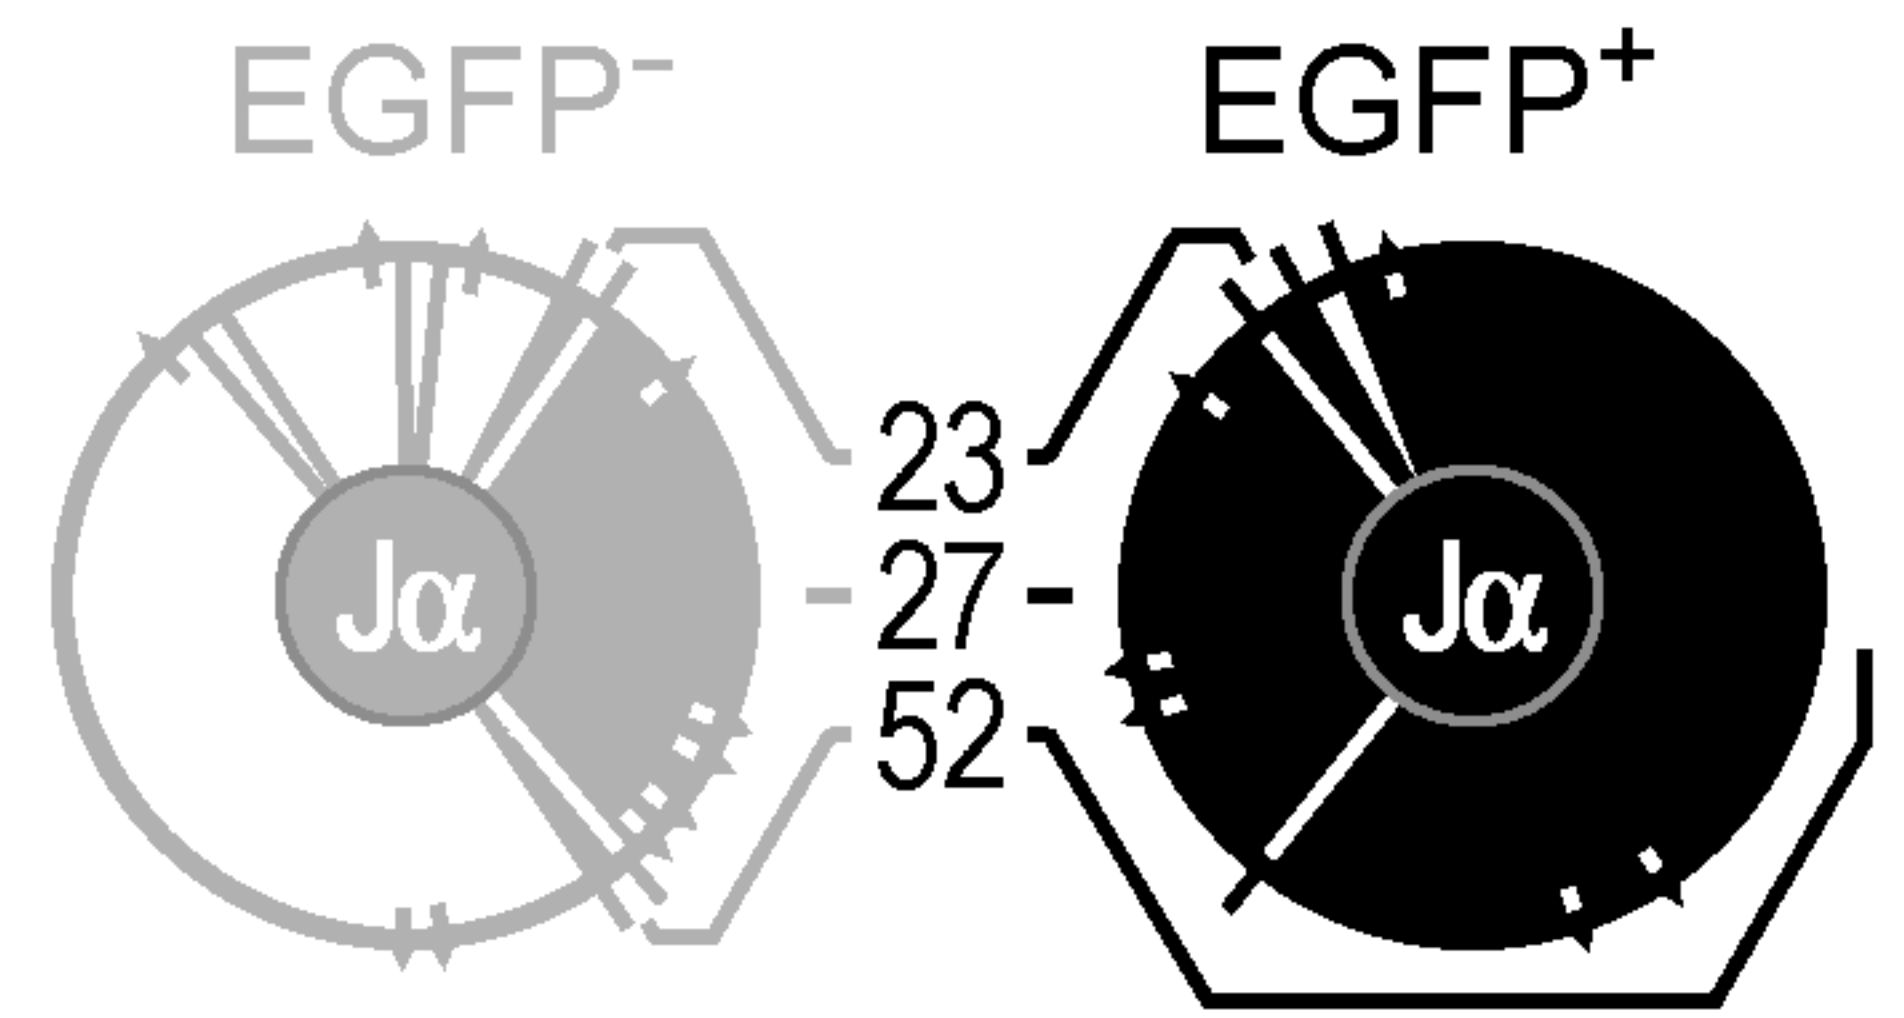*Vα17*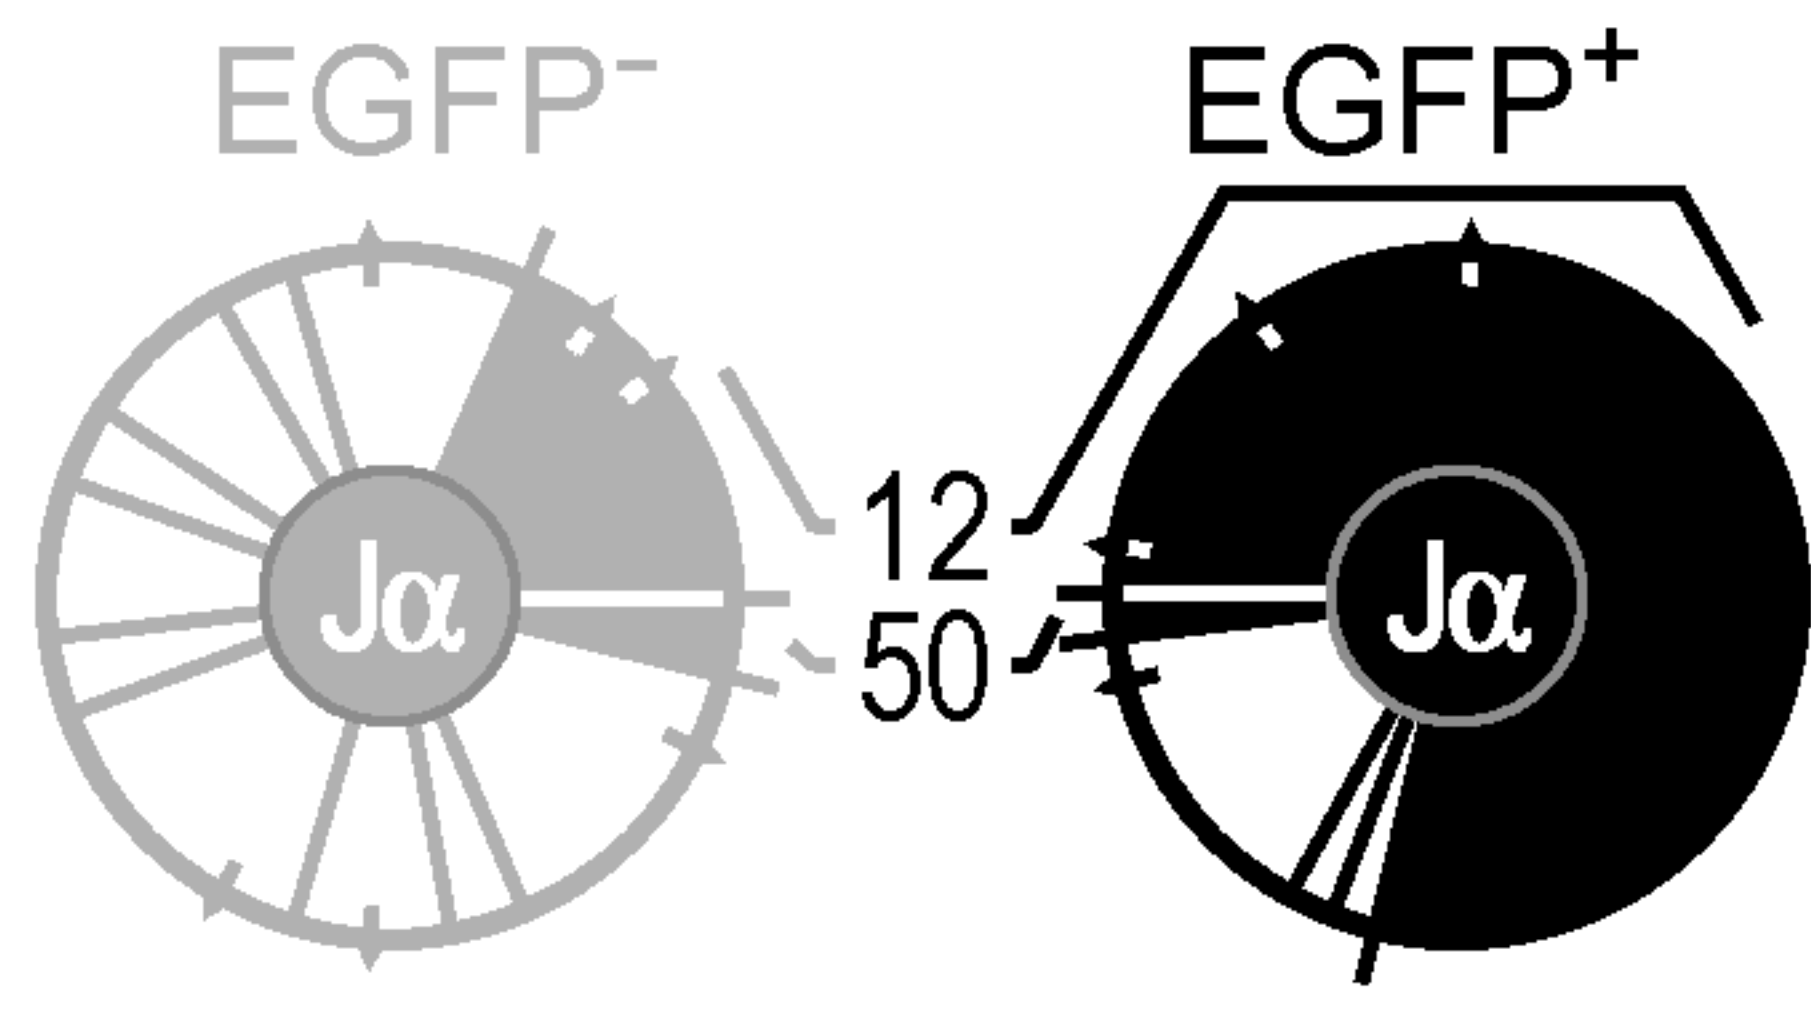*Vα18*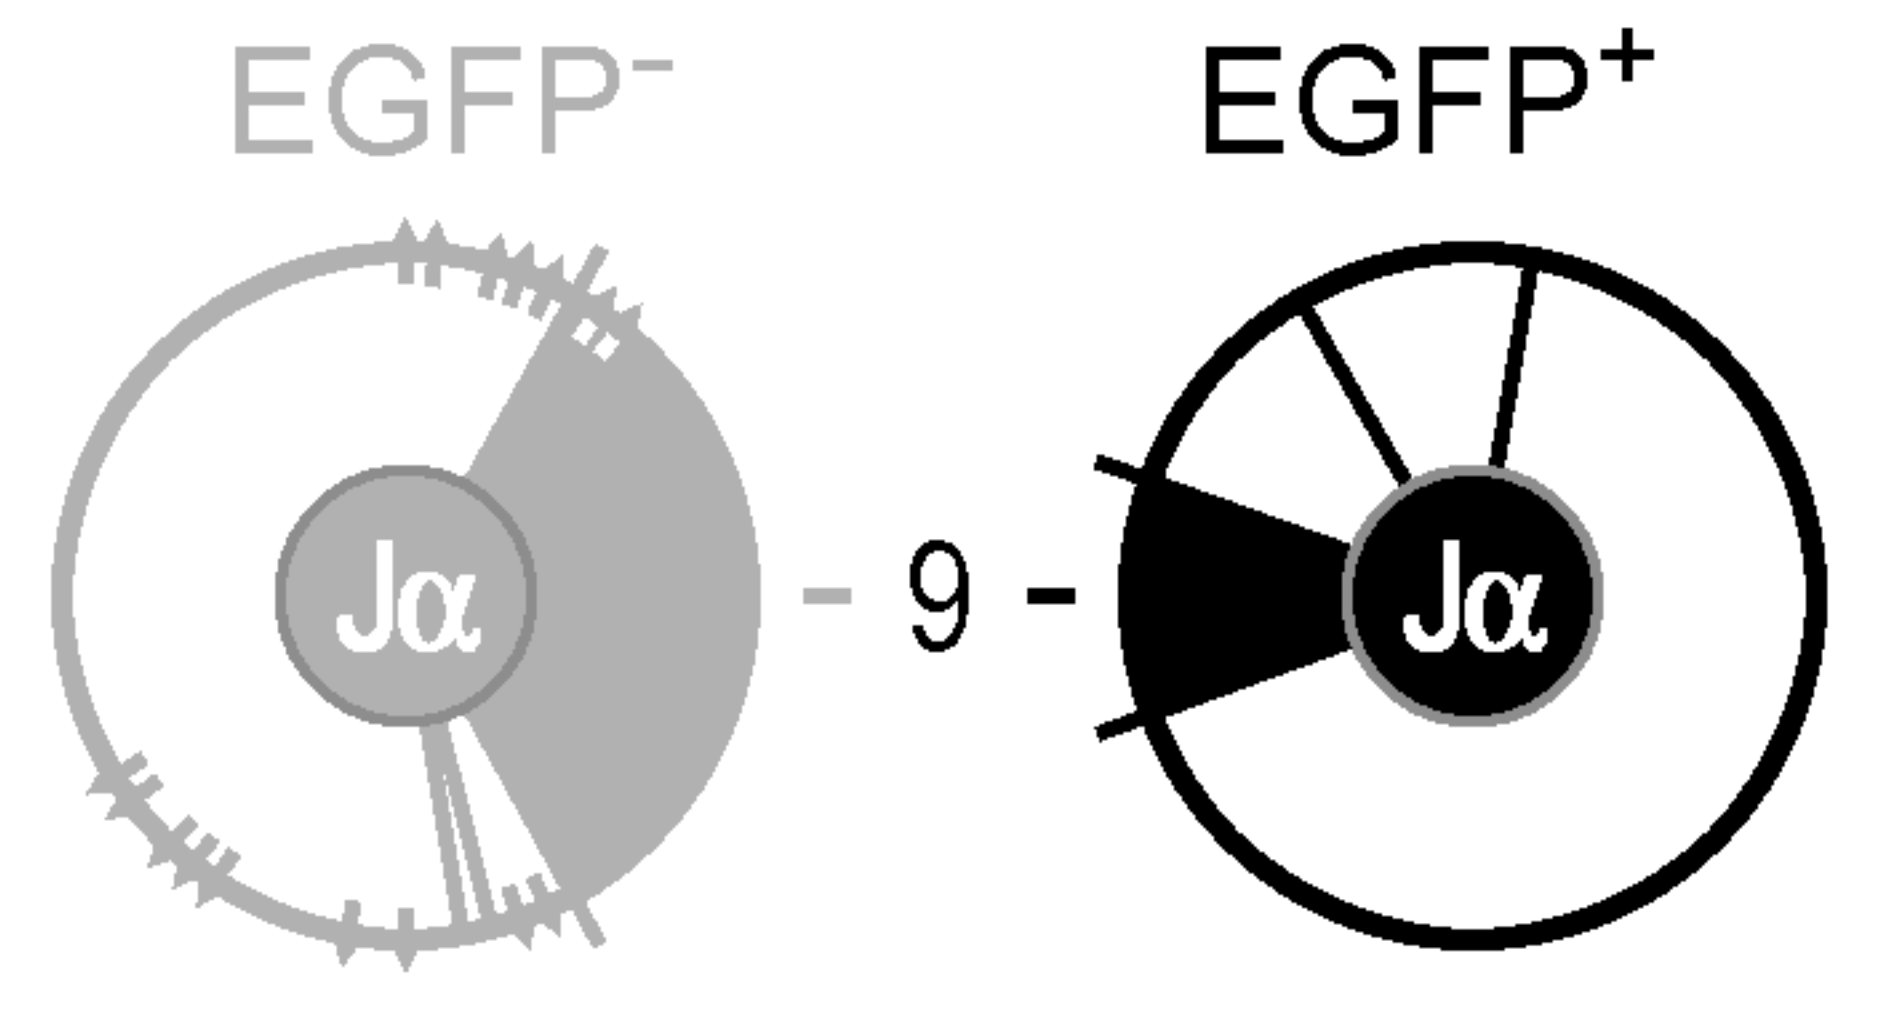**B***Vα15*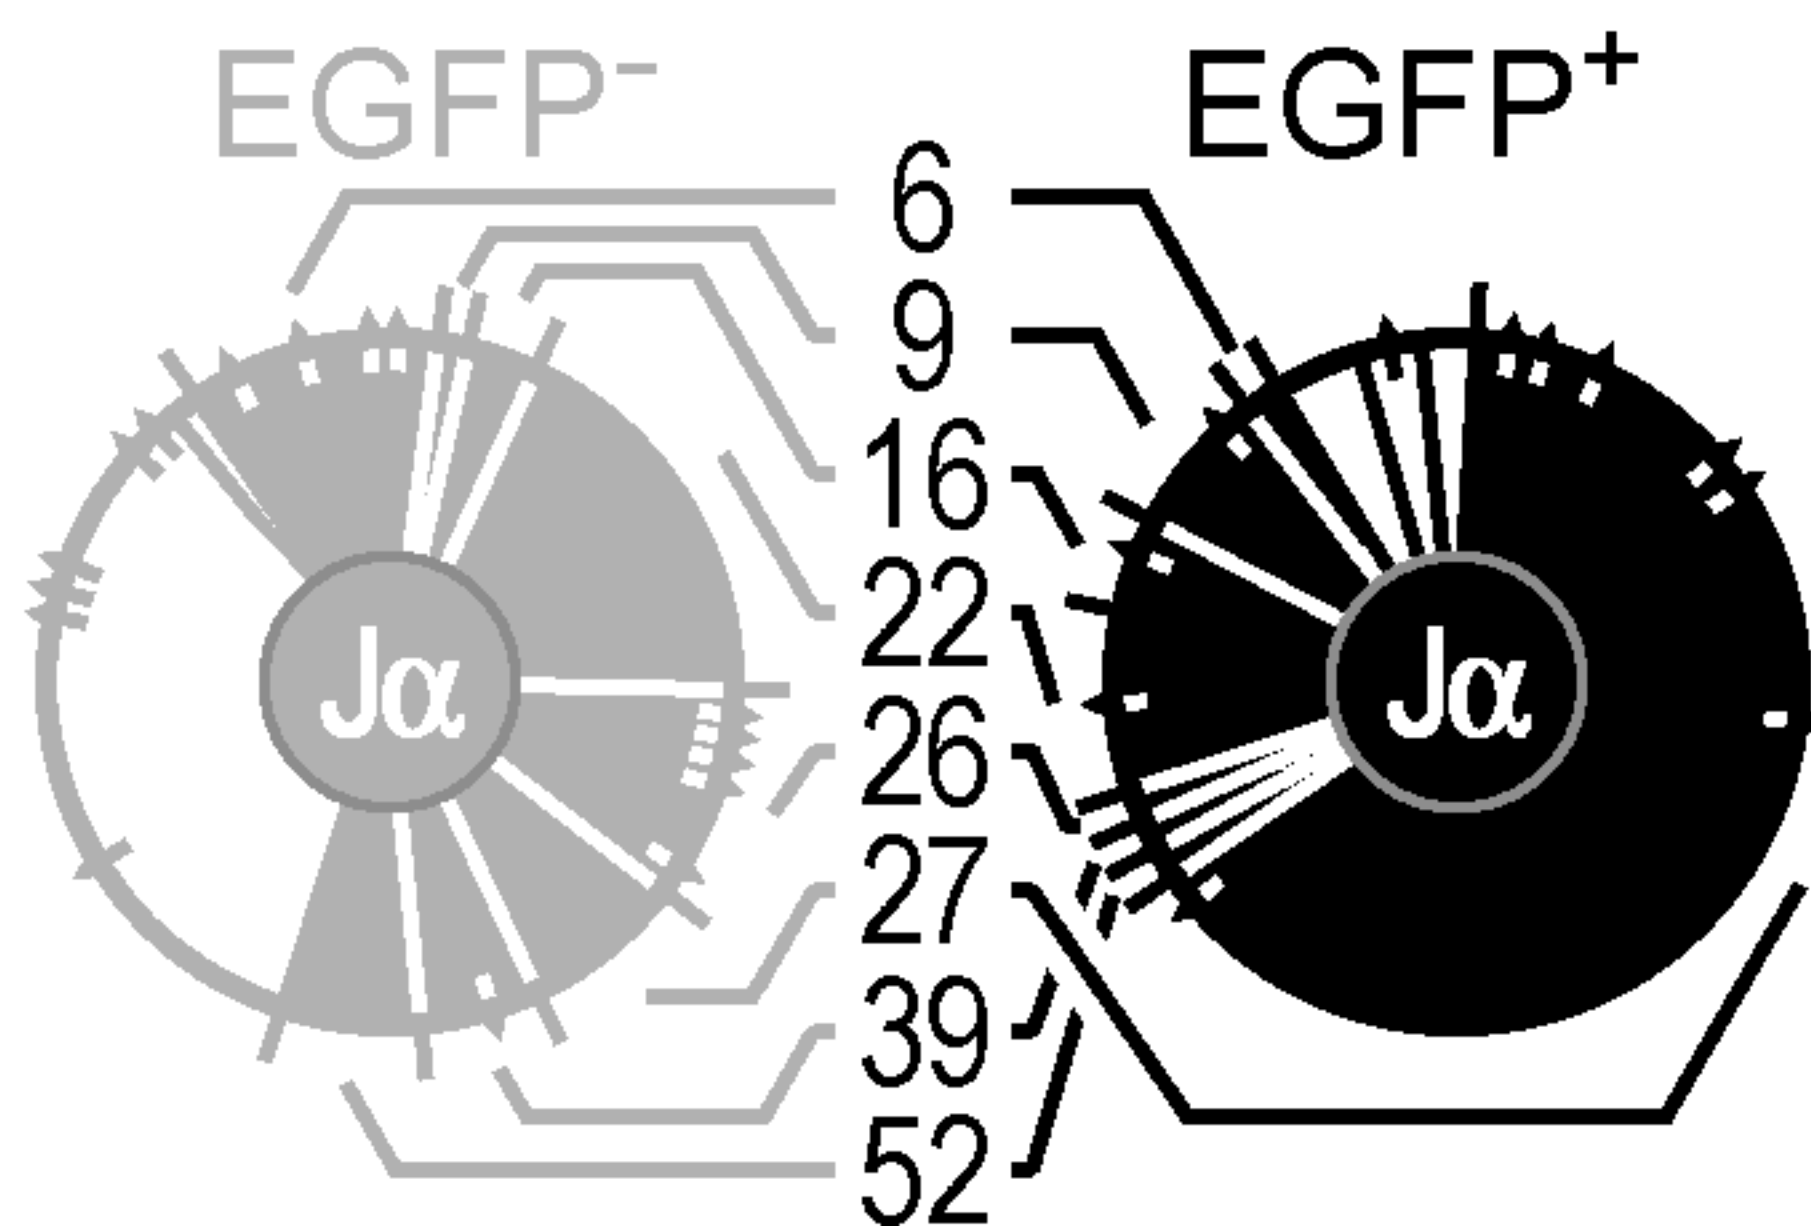**C***Vα6*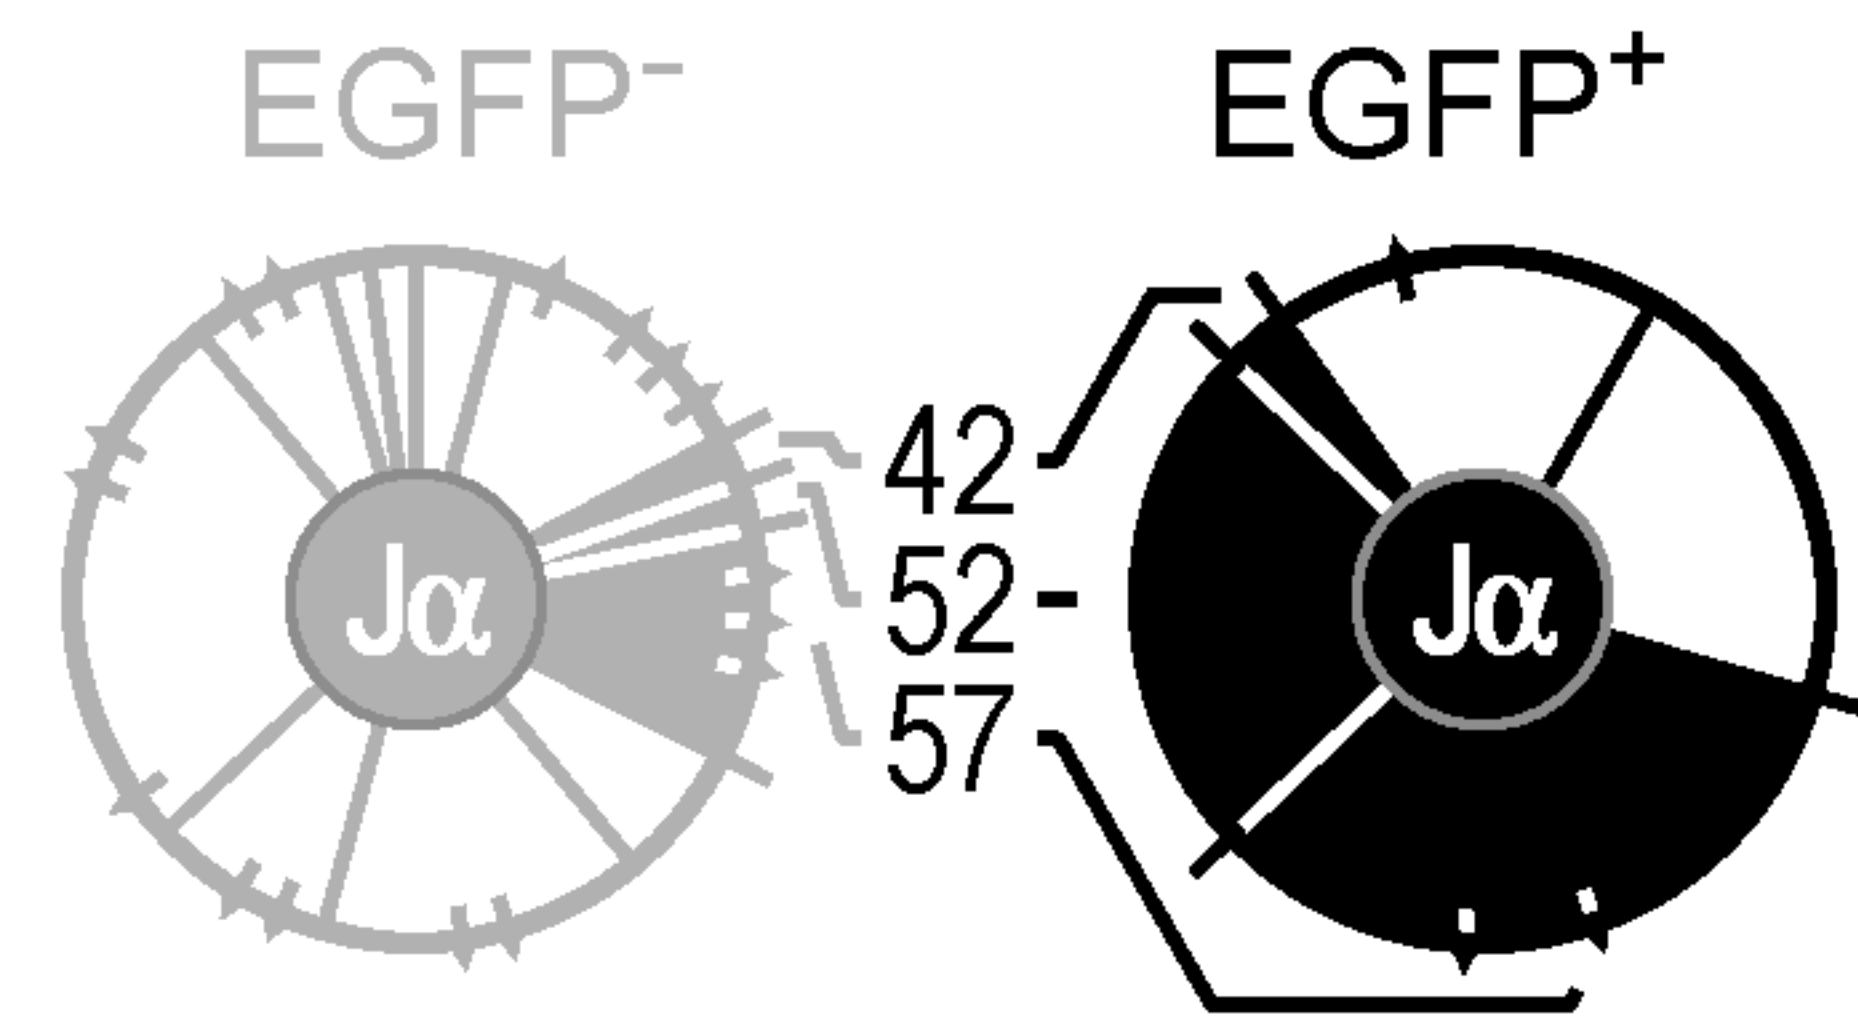

Supplement: NIHMS398526-supplement-4.pdf [file NIHMS398526-supplement-4.pdf]
